# Supplementary material for: Enabling High Activity Catalyst Co3O4@CeO2 for Propane Catalytic Oxidation via Inverse Loading
Source: MDPI journal article supplement (doi:10.3390/molecules28155930), 2023-08-07
Supplement: s1 [file s1]

## Supporting information

# Enabling High Activity Catalyst $\text{Co}_3\text{O}_4@\text{CeO}_2$ for Propane Catalytic Oxidation via Inverse Loading

Xuan Wang<sup>1</sup>, Wei Liang<sup>1</sup>, Changqing Lin<sup>2</sup>, Tie Zhang<sup>1</sup>, Jing Zhang<sup>1</sup>, Nan Sheng<sup>1,\*</sup>,  
Zhaoning Song<sup>3,\*</sup>, Jie Jiang<sup>1</sup>, Bing Sun<sup>1</sup> and Wei Xu<sup>1,\*</sup>

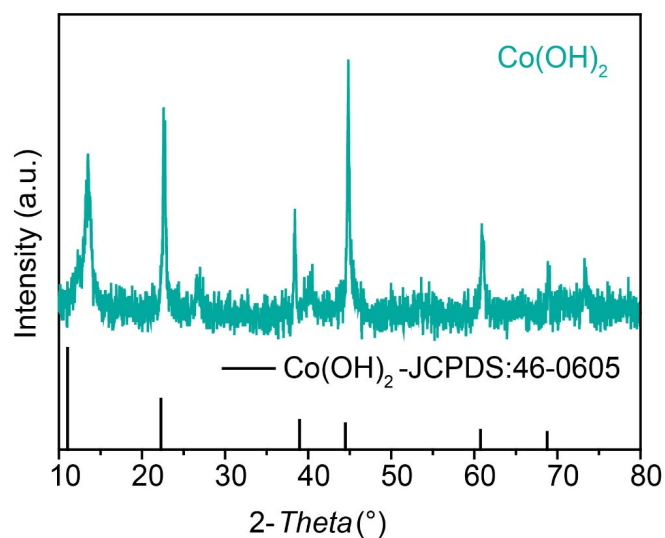

Figure. S1. PXRD patterns of  $\text{Co(OH)}_2$ .

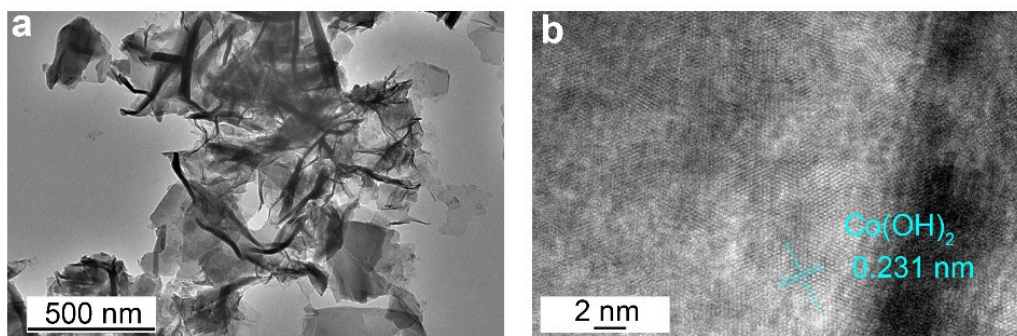

Figure. S2. Typical (a)TEM and (b) HRTEM images of  $\text{Co(OH)}_2$  nanosheets.

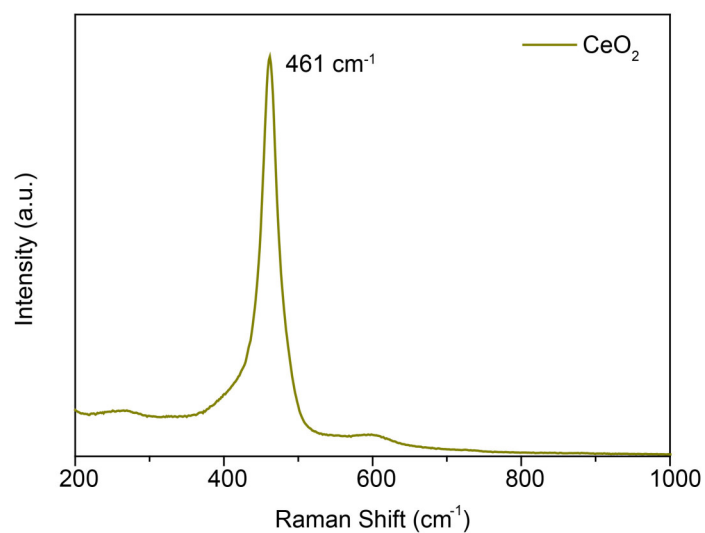

Figure. S3. Raman spectrum of CeO<sub>2</sub>.

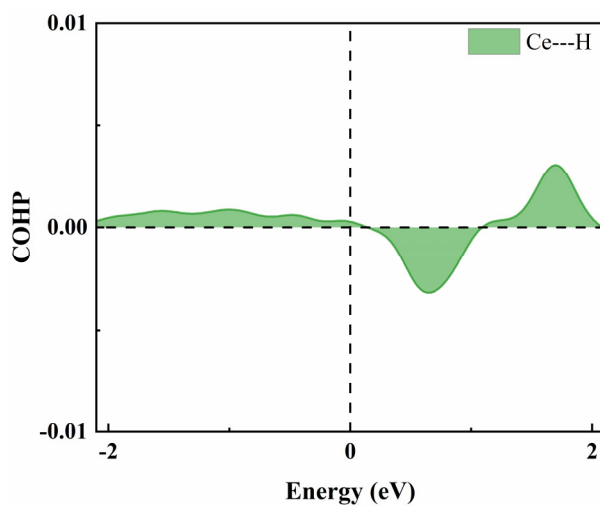

Figure. S4. The crystal orbital Hamilton population between Ce and H atoms in the Co<sub>3</sub>O<sub>4</sub>-OV-Ce adsorbed propane system.

**Table 1** Element compositions of the two catalysts analyzed by ICP technique.

| Samples                                              | Co (at.%) | Ce (at.%) | Mg (at.%) |
|------------------------------------------------------|-----------|-----------|-----------|
| Co <sub>3</sub> O <sub>4</sub> @CeO <sub>2</sub> -IE | 45.3      | 8.36      | 1.17      |
| Co <sub>3</sub> O <sub>4</sub> /CeO <sub>2</sub> -IM | 45.4      | 8.38      | /         |

**Table 2** . The ration of Co, Ce and O ions from XPS.

| Samples                                              | Co <sup>2+</sup> /Co <sup>3+</sup> (%) | Ce <sup>3+</sup> /Ce <sup>4+</sup> | O <sub>ad</sub> /O <sub>v</sub> /O <sub>L</sub> (%) |
|------------------------------------------------------|----------------------------------------|------------------------------------|-----------------------------------------------------|
| Co <sub>3</sub> O <sub>4</sub> @CeO <sub>2</sub> -IE | 47.7/18.1                              | 49.6/50.4                          | 6/40.7/53.3                                         |

|                                                      |           |           |             |
|------------------------------------------------------|-----------|-----------|-------------|
| Co <sub>3</sub> O <sub>4</sub> /CeO <sub>2</sub> -IM | 42.1/21.5 | 28.6/71.4 | 8.4/25/66.6 |
|------------------------------------------------------|-----------|-----------|-------------|

**Table 3.** Catalytic performances of Co<sub>3</sub>O<sub>4</sub>@CeO<sub>2</sub>-IE and Co<sub>3</sub>O<sub>4</sub>/CeO<sub>2</sub>-IM catalysts.

| Samples                                              | T <sub>50</sub> | T <sub>90</sub> | Reaction rate <sup>a</sup> |
|------------------------------------------------------|-----------------|-----------------|----------------------------|
| Co <sub>3</sub> O <sub>4</sub> @CeO <sub>2</sub> -IE | 217             | 235             | 9.80                       |
| Co <sub>3</sub> O <sub>4</sub> /CeO <sub>2</sub> -IM | 268             | 348             | 6.91                       |

<sup>a</sup>The feed gas was 0.5 vol% C<sub>3</sub>H<sub>8</sub> and 21 vol% O<sub>2</sub>, balanced with N<sub>2</sub>, and T = 235 °C, GHSV = 60,000 mL h g<sup>-1</sup>.
